# Supplementary material
Source: HighWire-hosted journal article supplement (https://rapm.bmj.com/highwire/filestream/14095/field_highwire_adjunct_files/1/rapm-2020-101917supp002_data_supplement.pdf)

**Appendix B – Study Flow Diagram.**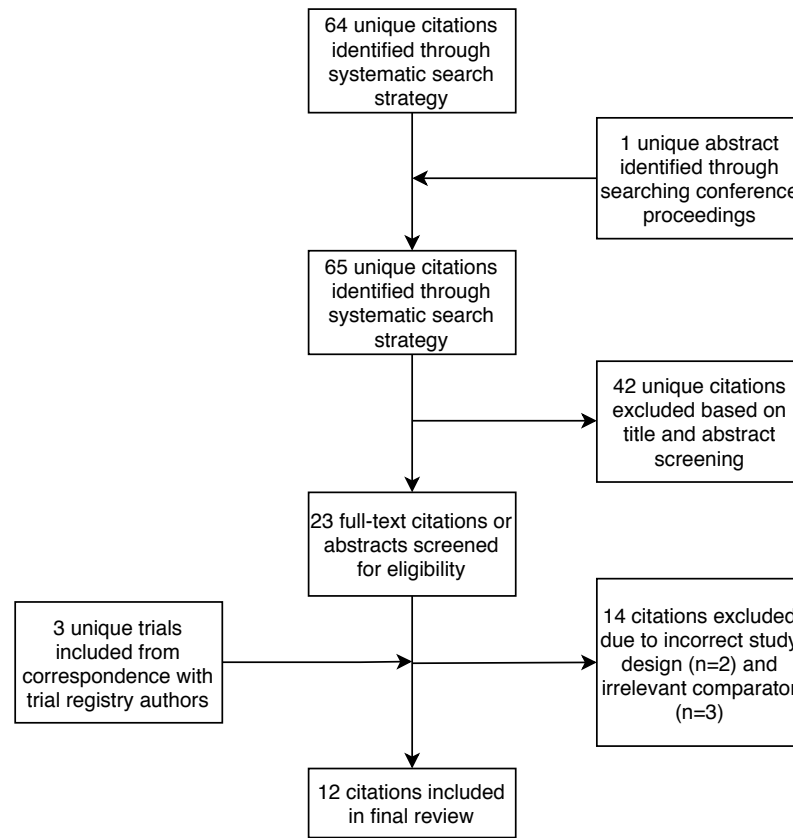

Supplement: rapm-2020-101917supp002_data_supplement.pdf [file rapm-2020-101917supp002_data_supplement.pdf]
